# Supplementary material for: Barcoding the Dendrobium (Orchidaceae) Species and Analysis of the Intragenomic Variation Based on the Internal Transcribed Spacer 2
Source: Biomed Res Int. 2017 Oct 17;2017:2734960. doi: 10.1155/2017/2734960 (PMC5664236; doi:10.1155/2017/2734960)
Supplement: Supplementary file 1 — Appendix S1: Sampling information of this study. Appendix S2: GenBank sequences used in this study. Appendix S3: Neighbor-Joining tree using total intra-genomic data. Appendix S4: Neighbor-Joining tree using total intra-specific data for phylogenetic analysis. [file 2734960.f1.zip]

Archive with 6 entries (5 files):
- 2734960.f1/
- 2734960.f1/Appendix S1 Sampling information of this study.docx
- 2734960.f1/Appendix S2 GenBank sequences used in this study.docx
- 2734960.f1/Appendix S3 Neighbor-Joining tree using total intra-genomic data.jpg
- 2734960.f1/Appendix S4 Neighbor-Joining tree using total intra-specific data for phylogenetic analysis.jpg
- 2734960.f1/Thumbs.db
